# Supplementary material for: Association of Communication Interventions to Discuss Code Status With Patient Decisions for Do-Not-Resuscitate Orders: A Systematic Review and Meta-analysis
Source: PubMed Central journal article supplement (PMC6563579; doi:10.1001/jamanetworkopen.2019.5033), 2019-06-07

## Supplementary Online Content

Becker C, Lecheler L, Hochstrasser S, et al. Association of communication interventions to discuss code status with patient decisions for do-not-resuscitate orders: a systematic review and meta-analysis. *JAMA Netw Open*. 2019;2(6):e195033.  
doi:10.1001/jamanetworkopen.2019.5033

**eTable 1.** Search Strategy for PubMed

**eTable 2.** Risk Assessment by Cochrane Risk of Bias Tool

**eReferences.**

**eFigure.** Flow of Studies Through the Review Process

This supplementary material has been provided by the authors to give readers additional information about their work.

**eTable 1.** Search Strategy for PubMed

Search date from inception to 19 November 2018; Hits: 2805

|                                                                                                                                                                                                                                                                                                                                                                                                                                              |
|----------------------------------------------------------------------------------------------------------------------------------------------------------------------------------------------------------------------------------------------------------------------------------------------------------------------------------------------------------------------------------------------------------------------------------------------|
| (resuscitation[mh] OR resuscitat*[tiab] OR do-not-resuscitate[tiab] OR CPR[tiab] OR Code Blue[tiab] OR code status[tiab] OR (Life[tiab] AND Prolong*[tiab]) OR cardiopulmonary arrest[tiab] OR heart massage[tiab] OR cardiac massage[tiab])                                                                                                                                                                                                 |
| AND                                                                                                                                                                                                                                                                                                                                                                                                                                          |
| (decision making[tiab] OR Decision Making[mh] OR decision aid[tiab] OR decision support[tiab] OR "Decision Support Systems, Clinical"[mh] OR decision support[tiab] OR communicat*[tiab] OR conversation[tiab] OR dicuss*[tiab] OR dialogue[tiab] OR educat*[tiab] OR "Patient Education Handout" [Publication Type] OR "Patient Education as Topic"[Mesh:noexp] OR "Health Communication"[mh] OR intervention[tiab] OR interventions[tiab]) |
| AND                                                                                                                                                                                                                                                                                                                                                                                                                                          |
| (randomized controlled trial[pt] OR controlled clinical trial[pt] OR randomized[tiab] OR placebo[tiab] OR "clinical trials as topic"[MeSH Terms:noexp] OR randomly[tiab] OR trial[ti] NOT ("animals"[MeSH Terms] NOT "humans"[MeSH Terms]))                                                                                                                                                                                                  |

**Search results for other Databases**

EMBASE via EMBASE (search date from inception to 19 November 2018); Hits: 3206

PsycINFO via PsycINFO (search date from inception to 19 November 2018); Hits: 835

CINAHL via CINAHL (search date from inception to 19 November 2018); Hits; 155

**eTable 2.** Risk Assessment by Cochrane Risk of Bias Tool

Green colour denotes low risk of bias, red colour denotes high risk of bias, yellow colour denotes unclear risk of bias.

| AUTHOR / YEAR                               | STUDY NAME                                                                                                                          | RANDOM SEQUENCE GENERATION             | ALLOCATION CONCEALMENT                                                                               | SELECTIVE REPORTING                              | OTHER BIAS                                      | BLINDING OF PARTICIPANTS AND PERSONNEL                     | BLINDING OF OUTCOME ASSESSMENT                                         | INCOMPLETE OUTCOME DATA                                                                                                                                    | RISK OF BIAS |
|---------------------------------------------|-------------------------------------------------------------------------------------------------------------------------------------|----------------------------------------|------------------------------------------------------------------------------------------------------|--------------------------------------------------|-------------------------------------------------|------------------------------------------------------------|------------------------------------------------------------------------|------------------------------------------------------------------------------------------------------------------------------------------------------------|--------------|
| Nicolasora, Nelson et al 2006 <sup>1</sup>  | If Asked, Hospitalized Patients Will Choose Whether to Receive Life-Sustaining Therapies                                            | Usage of random number generator       | Usage/method of concealment not described                                                            | Insufficient information to permit judgement     | Control group was not approached by study team  | Outcome is not likely to be influenced by lack of blinding | Outcome measurement is not likely to be influenced by lack of blinding | No missing outcome data                                                                                                                                    | HIGH         |
| Stein, Rhea A. et al 2013 <sup>2</sup>      | Randomized Controlled Trial of a Structured Intervention to Facilitate End-of-Life Decision Making in Patients With Advanced Cancer | Usage of computer randomization scheme | Randomization was concealed                                                                          | Insufficient information to permit judgement     | Study seems to be free of other sources of bias | Outcome is not likely to be influenced by lack of blinding | Outcome measurement is not likely to be influenced by lack of blinding | Reasons for missing outcome data unlikely to be related to true outcome / Missing outcome data balanced across groups / Missing data appropriately imputed | LOW          |
| El-Jawahri, Areej et al 2010 <sup>3</sup>   | Use of Video to Facilitate End-of-Life Discussions With Patients With Cancer: A Randomized Controlled Trial                         | Usage of computer randomization scheme | Usage of envelopes for concealment described but unknown if sequentially numbered, opaque and sealed | Insufficient information to permit judgement     | Study seems to be free of other sources of bias | Outcome is not likely to be influenced by lack of blinding | Outcome measurement is not likely to be influenced by lack of blinding | No missing outcome data                                                                                                                                    | UNCLEAR      |
| Volandes, Angelo E. et al 2012 <sup>4</sup> | Randomized Controlled Trial of a Video Decision Support Tool for Cardiopulmonary                                                    | Usage of computer randomization scheme | Usage of envelopes for concealment described but unknown if                                          | Study protocol available, pre-specified outcomes | Study seems to be free of other                 | Outcome is not likely to be influenced by lack of blinding | Outcome measurement is not likely to be                                | Reasons for missing outcome data unlikely to be related to true                                                                                            | LOW          |

|                                                 |                                                                                                                            |                                                                                    |                                                                          |                                                                                                                   |                                                 |                                                            |                                                                        |                                                                                                                         |         |
|-------------------------------------------------|----------------------------------------------------------------------------------------------------------------------------|------------------------------------------------------------------------------------|--------------------------------------------------------------------------|-------------------------------------------------------------------------------------------------------------------|-------------------------------------------------|------------------------------------------------------------|------------------------------------------------------------------------|-------------------------------------------------------------------------------------------------------------------------|---------|
|                                                 | <b>Resuscitation Decision Making in Advanced Cancer</b>                                                                    |                                                                                    | sequentially numbered, opaque and sealed                                 | reported (NCT01241929)                                                                                            | sources of bias                                 |                                                            | influenced by lack of blinding                                         | outcome / Missing outcome data balanced across groups                                                                   |         |
| <b>El-Jawahri, Areej et al 2015<sup>5</sup></b> | <b>A Randomized Controlled Trial of a CPR and Intubation Video Decision Support Tool for Hospitalized Patients</b>         | Usage of computer randomization scheme                                             | Randomization was concealed with numbered envelopes                      | Study protocol available , pre-specified primary and secondary outcomes relevant to review reported (NCT01325519) | Study seems to be free of other sources of bias | Outcome is not likely to be influenced by lack of blinding | Outcome measurement is not likely to be influenced by lack of blinding | No missing outcome data (Prim.EP), no information if missing data of sec. EP but unlikely to be related to true outcome | LOW     |
| <b>Mittal, Kriti et al 2014<sup>6</sup></b>     | <b>Use of a standardized code status explanation by residents among hospitalized patients</b>                              | Insufficient information about the sequence generation process to permit judgement | Usage/method of concealment not described                                | Insufficient information to permit judgement                                                                      | Study seems to be free of other sources of bias | Outcome is not likely to be influenced by lack of blinding | Outcome measurement is not likely to be influenced by lack of blinding | Reasons for missing outcome data unlikely to be related to true outcome / Missing outcome data balanced across groups   | HIGH    |
| <b>Rhondali, Wadih et al 2013<sup>7</sup></b>   | <b>Patient-Physician Communication About Code Status Preferences</b>                                                       | Usage of computer randomization scheme                                             | Method of concealment not described                                      | Insufficient information to permit judgement                                                                      | Study seems to be free of other sources of bias | Outcome is not likely to be influenced by lack of blinding | Outcome measurement is not likely to be influenced by lack of blinding | Reasons for missing outcome data unlikely to be related to true outcome                                                 | UNCLEAR |
| <b>Merino, Aimee M. et al 2017<sup>8</sup></b>  | <b>A Randomized Controlled Trial of a CPR Decision Support Video for Patients Admitted to the General Medicine Service</b> | Usage of random number generator                                                   | Usage/method of concealment not described                                | Insufficient information to permit judgement                                                                      | Study seems to be free of other sources of bias | Outcome is not likely to be influenced by lack of blinding | Outcome measurement is not likely to be influenced by lack of blinding | Reasons for missing outcome data unlikely to be related to true outcome                                                 | UNCLEAR |
| <b>Wilson, ME et al 2015<sup>9</sup></b>        | <b>A video to improve patient and surrogate understanding of cardiopulmonary resuscitation</b>                             | Usage of random number generator                                                   | Randomization was concealed before assessment with sequentially numbered | Study protocol available , pre-specified primary outcomes reported                                                | Study seems to be free of other sources of bias | Outcome is not likely to be influenced by lack of blinding | Outcome measurement is not likely to be influenced by lack of blinding | Reasons for missing outcome data unlikely to be related to true outcome                                                 | LOW     |

|                                              |                                                                                                                                                            |                                        |                                                                                                      |                                                                                          |                                                 |                                                            |                                                                        |                                                                                                                       |         |
|----------------------------------------------|------------------------------------------------------------------------------------------------------------------------------------------------------------|----------------------------------------|------------------------------------------------------------------------------------------------------|------------------------------------------------------------------------------------------|-------------------------------------------------|------------------------------------------------------------|------------------------------------------------------------------------|-----------------------------------------------------------------------------------------------------------------------|---------|
|                                              | choices in the ICU: a randomized controlled trial                                                                                                          |                                        | opaque sealed envelopes                                                                              | (NCT10-003628)                                                                           |                                                 |                                                            |                                                                        | / Missing outcome data balanced across groups                                                                         |         |
| Richardson-Royer, C et al 2018 <sup>10</sup> | A video depicting resuscitation did not impact upon patients' decision making                                                                              | Method of randomization not described  | Usage/method of concealment not described                                                            | Study protocol available, relevant pre-specified primary outcomes reported (NCT01878968) | Study seems to be free of other sources of bias | Outcome is not likely to be influenced by lack of blinding | Outcome measurement is not likely to be influenced by lack of blinding | No missing outcome data                                                                                               | UNCLEAR |
| Epstein, Andrew S 2013 <sup>11</sup>         | A Randomized Controlled Trial of a Cardiopulmonary Resuscitation Video in Advance Care Planning for Progressive Pancreas and Hepatobiliary Cancer Patients | Usage of permuted block randomization  | Usage/method of concealment not described                                                            | Insufficient information to permit judgement                                             | Study seems to be free of other sources of bias | Outcome is not likely to be influenced by lack of blinding | Outcome measurement is not likely to be influenced by lack of blinding | Reasons for missing outcome data unlikely to be related to true outcome / Missing outcome data balanced across groups | UNCLEAR |
| Volandes, Angelo E. 2012 <sup>12</sup>       | A Randomized Controlled Trial of a Goals-of-Care Video for Elderly Patients Admitted to Skilled Nursing Facilities                                         | Usage of computer randomization scheme | Usage of envelopes for concealment described but unknown if sequentially numbered, opaque and sealed | Study protocol available, relevant pre-specified primary outcome reported (NCT01233973)  | Study seems to be free of other sources of bias | Outcome is not likely to be influenced by lack of blinding | Outcome measurement is not likely to be influenced by lack of blinding | Reasons for missing outcome data unlikely to be related to true outcome / Missing outcome data balanced across groups | LOW     |
| El-Jawahri, Areej et al 2016 <sup>13</sup>   | A Randomized Controlled Trial of an Advance Care Planning Video Decision Support Tool for Patients with Advanced Heart Failure                             | Usage of computer randomization scheme | Usage of envelopes for concealment described but unknown if sequentially numbered, opaque and sealed | Study protocol available, pre-specified outcomes reported (NCT01589120)                  | Study seems to be free of other sources of bias | Outcome is not likely to be influenced by lack of blinding | Outcome measurement is not likely to be influenced by lack of blinding | Reasons for missing outcome data unlikely to be related to true outcome / Missing outcome data balanced across groups | LOW     |

|                                                   |                                                                                                   |                                                                         |                                                                                                                  |                                                     |                                                                                                                              |                                                                   |                                                                               |                                               |             |
|---------------------------------------------------|---------------------------------------------------------------------------------------------------|-------------------------------------------------------------------------|------------------------------------------------------------------------------------------------------------------|-----------------------------------------------------|------------------------------------------------------------------------------------------------------------------------------|-------------------------------------------------------------------|-------------------------------------------------------------------------------|-----------------------------------------------|-------------|
| <p><b>Yamada, Ryo et al 1999<sup>14</sup></b></p> | <p><b>A Multimedia Intervention on Cardiopulmonary Resuscitation and Advance Directives</b></p>   | <p>Randomization based on clinic half-day and the week of the month</p> | <p>Usage/method of concealment not described</p>                                                                 | <p>Insufficient information to permit judgement</p> | <p>Study seems to be free of other sources of bias</p>                                                                       | <p>Outcome is not likely to be influenced by lack of blinding</p> | <p>Outcome measurement is not likely to be influenced by lack of blinding</p> | <p>Insufficient reporting of missing data</p> | <p>HIGH</p> |
| <p><b>Kirchhoff et al 2012<sup>15</sup></b></p>   | <p><b>Impact of a Disease-Specific Advance Care Planning Intervention on End-of-life Care</b></p> | <p>Method of randomization not described</p>                            | <p>Usage of sealed-envelope method for concealment described but unknown if sequentially numbered and opaque</p> | <p>Insufficient information to permit judgement</p> | <p>Surrogates involved in intervention; Relevant outcome only for deceased patients way of assessment of outcome unclear</p> | <p>Outcome is not likely to be influenced by lack of blinding</p> | <p>Outcome measurement is not likely to be influenced by lack of blinding</p> | <p>No missing outcome data</p>                | <p>HIGH</p> |

## References

1. Nicolasora N, Pannala R, Mountantonakis S, et al. If asked, hospitalized patients will choose whether to receive life-sustaining therapies. *J Hosp Med.* 2006;1(3):161-167.
2. Stein RA, Sharpe L, Bell ML, Boyle FM, Dunn SM, Clarke SJ. Randomized controlled trial of a structured intervention to facilitate end-of-life decision making in patients with advanced cancer. *J Clin Oncol.* 2013;31(27):3403-3410.
3. El-Jawahri A, Podgurski LM, Eichler AF, et al. Use of video to facilitate end-of-life discussions with patients with cancer: a randomized controlled trial. *J Clin Oncol.* 2010;28(2):305-310.
4. Volandes AE, Paasche-Orlow MK, Mitchell SL, et al. Randomized controlled trial of a video decision support tool for cardiopulmonary resuscitation decision making in advanced cancer. *J Clin Oncol.* 2013;31(3):380-386.
5. El-Jawahri A, Mitchell SL, Paasche-Orlow MK, et al. A Randomized Controlled Trial of a CPR and Intubation Video Decision Support Tool for Hospitalized Patients. *J Gen Intern Med.* 2015;30(8):1071-1080.
6. Mittal K, Sharma K, Dangayach N, et al. Use of a standardized code status explanation by residents among hospitalized patients. *J Community Hosp Intern Med Perspect.* 2014;4.
7. Rhondali W, Perez-Cruz P, Hui D, et al. Patient-physician communication about code status preferences: a randomized controlled trial. *Cancer.* 2013;119(11):2067-2073.
8. Merino AM, Greiner R, Hartwig K. A Randomized Controlled Trial of a CPR Decision Support Video for Patients Admitted to the General Medicine Service. *J Hosp Med.* 2017;12(9):700-704.
9. Wilson ME, Krupa A, Hinds RF, et al. A video to improve patient and surrogate understanding of cardiopulmonary resuscitation choices in the ICU: a randomized controlled trial. *Crit Care Med.* 2015;43(3):621-629.
10. Richardson-Royer C, Naqvi I, Riffel C, et al. A video depicting resuscitation did not impact upon patients' decision-making. *Int J Gen Med.* 2018;11:73-77.
11. Epstein AS, Volandes AE, Chen LY, et al. A randomized controlled trial of a cardiopulmonary resuscitation video in advance care planning for progressive pancreas and hepatobiliary cancer patients. *J Palliat Med.* 2013;16(6):623-631.
12. Volandes AE, Brandeis GH, Davis AD, et al. A randomized controlled trial of a goals-of-care video for elderly patients admitted to skilled nursing facilities. *J Palliat Med.* 2012;15(7):805-811.
13. El-Jawahri A, Paasche-Orlow MK, Matlock D, et al. Randomized, Controlled Trial of an Advance Care Planning Video Decision Support Tool for Patients With Advanced Heart Failure. *Circulation.* 2016;134(1):52-60.
14. Yamada R, Galecki AT, Goold SD, Hogikyan RV. A multimedia intervention on cardiopulmonary resuscitation and advance directives. *J Gen Intern Med.* 1999;14(9):559-563.
15. Kirchhoff KT, Hammes BJ, Kehl KA, Briggs LA, Brown RL. Effect of a disease-specific advance care planning intervention on end-of-life care. *J Am Geriatr Soc.* 2012;60(5):946-950.

**eFigure.** Flow of Studies Through the Review Process

### PRISMA 2009 Flow Diagram

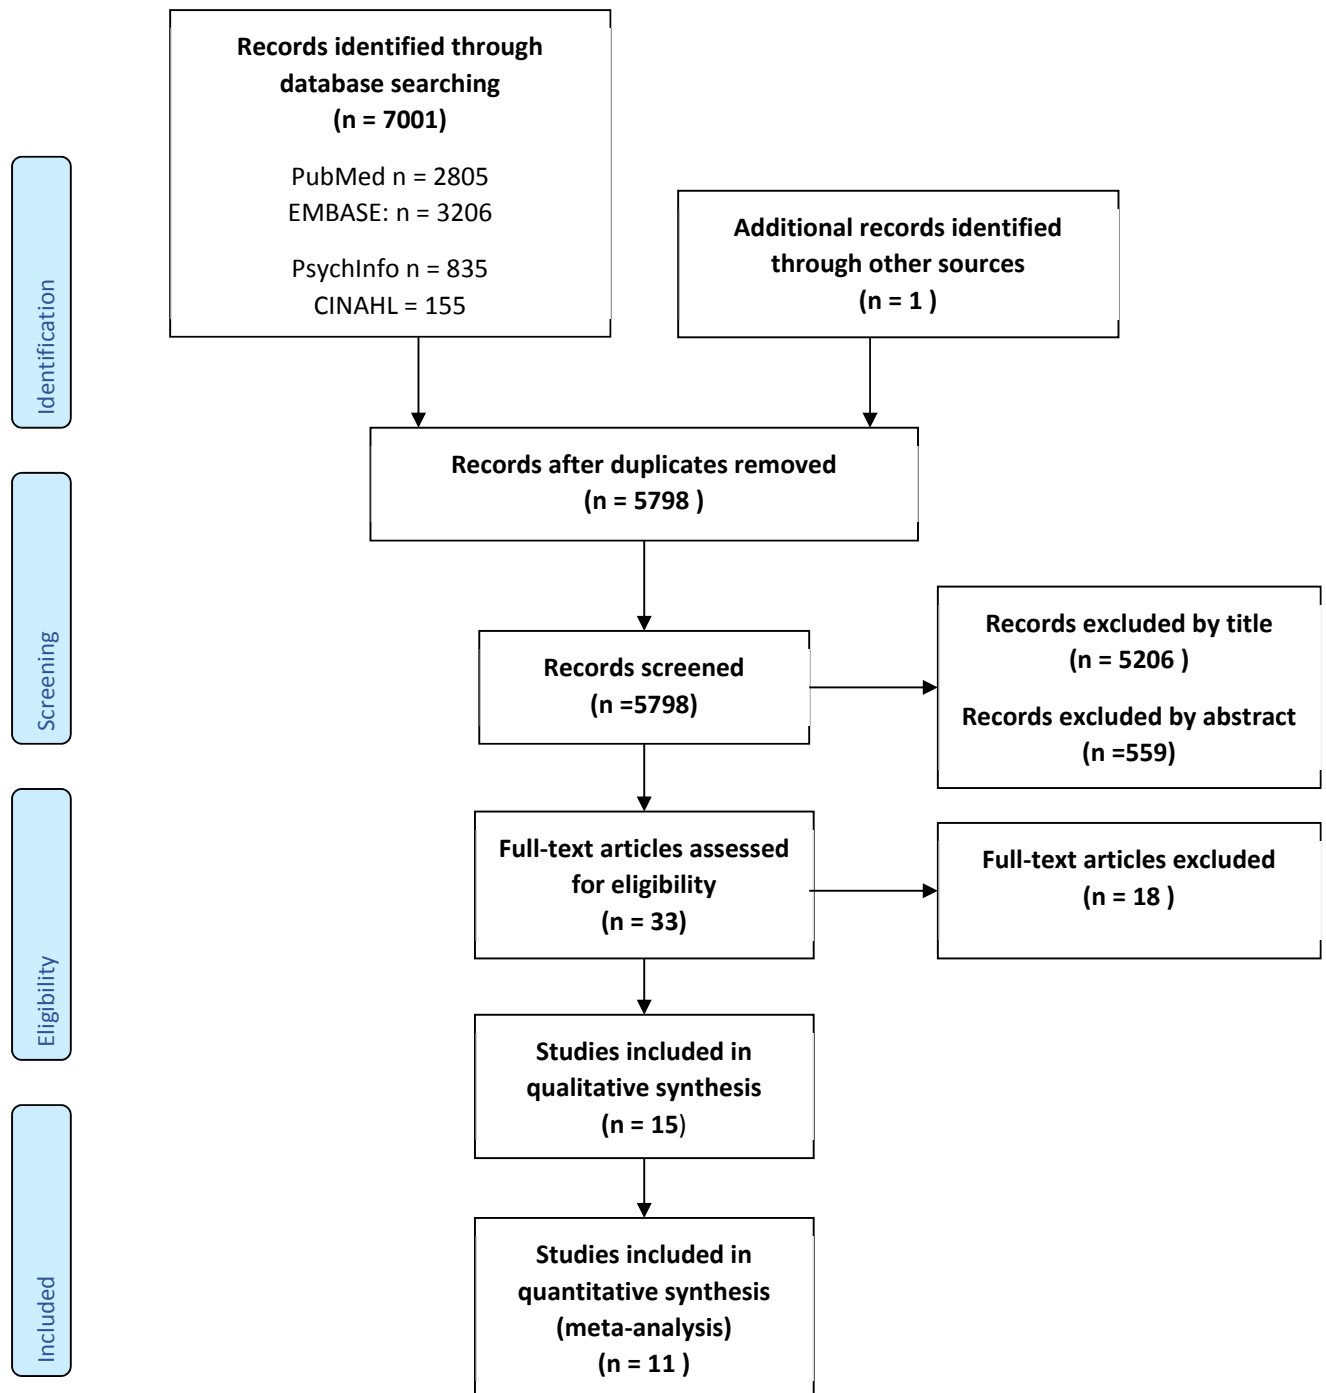

Supplement: jamanetwopen-2-e195033-s001.pdf [file jamanetwopen-2-e195033-s001.pdf]
